# Supplementary material for: Ten Years of Deformed Wing Virus (DWV) in Hawaiian Honey Bees (Apis mellifera), the Dominant DWV-A Variant Is Potentially Being Replaced by Variants with a DWV-B Coding Sequence
Source: MDPI journal article supplement (doi:10.3390/v13060969), 2021-05-24
Supplement: s1 [file s1]

## Supplementary data

Includes the data of the samples used in the paper (Supplementary tables 1-3), the references used to construct figure 3 (Supplementary table 4) and a figure to illustrate the comparison of the treatment types (Supplementary figure 1)

Supplementary Table S1. Kauai samples, NEG/UD = Negative/Undetected, BL = Below the quantifiable threshold

| Sample ID    | Collection date | Crush date | RNA conc. | Extraction date | Dilution factor | Type    | Treatment | Average copy no. |            | Genome equivalent |            |
|--------------|-----------------|------------|-----------|-----------------|-----------------|---------|-----------|------------------|------------|-------------------|------------|
|              |                 |            |           |                 |                 |         |           | DWV-A RdRp       | DWV-B RdRp | DWV-A RdRp        | DWV-B RdRp |
| KCC44        | 04/12/2019      | 09/01/2020 | 624.0     | 24/11/2020      | 12.48           | Managed | No        | BL               | 2782.58    | BL                | 2782.58    |
| T7           | 15/11/2018      | 08/01/2020 | 233.7     | 24/11/2020      | 4.67            | Feral   | No        | NEG/UD           | BL         | NEG/UD            | BL         |
| T4           | 29/08/2018      | 08/01/2020 | 283.3     | 24/11/2020      | 5.67            | Feral   | No        | BL               | 649.58     | BL                | 649.58     |
| KRN4         | 04/12/2019      | 09/01/2020 | 693.1     | 24/11/2020      | 13.86           | Managed | No        | BL               | NEG/UD     | BL                | NEG/UD     |
| KRN5         | 04/12/2019      | 09/01/2020 | 502.4     | 24/11/2020      | 10.05           | Managed | No        | NEG/UD           | NEG/UD     | NEG/UD            | NEG/UD     |
| KNCW4        | 04/12/2019      | 10/01/2020 | 614.9     | 24/11/2020      | 12.30           | Managed | No        | 264.16           | NEG/UD     | 264.16            | NEG/UD     |
| KNLEW2       | 04/12/2019      | 10/01/2020 | 326.9     | 24/11/2020      | 6.54            | Managed | No        | NEG/UD           | BL         | NEG/UD            | BL         |
| KRN2         | 04/12/2019      | 10/01/2020 | 673.4     | 24/11/2020      | 13.47           | Managed | No        | 317.90           | BL         | 317.90            | BL         |
| KNCE5        | 04/12/2019      | 10/01/2020 | 916       | 24/11/2020      | 18.32           | Managed | No        | BL               | BL         | NEG/UD            | BL         |
| KNCW1 124-19 | 04/12/2019      | 10/01/2020 | 734.9     | 24/11/2020      | 14.70           | Managed | No        | NEG/UD           | BL         | NEG/UD            | BL         |
| KCC 73P      | 04/12/2019      | 10/01/2020 | 530.8     | 24/11/2020      | 10.62           | Managed | No        | NEG/UD           | NEG/UD     | NEG/UD            | NEG/UD     |
| KCC41        | 04/12/2019      | 13/01/2020 | 523.9     | 24/11/2020      | 10.48           | Managed | No        | BL               | NEG/UD     | BL                | NEG/UD     |
| KCC60        | 04/12/2019      | 13/01/2020 | 669.8     | 24/11/2020      | 13.40           | Managed | No        | NEG/UD           | BL         | NEG/UD            | BL         |
| KNCE4        | 04/12/2019      | 13/01/2020 | 653.3     | 24/11/2020      | 13.07           | Managed | No        | NEG/UD           | BL         | NEG/UD            | BL         |
| KNCE1        | 04/12/2019      | 13/01/2020 | 723.4     | 24/11/2020      | 14.47           | Managed | No        | NEG/UD           | NEG/UD     | NEG/UD            | NEG/UD     |
| KCC4         | 04/12/2019      | 13/01/2020 | 661       | 24/11/2020      | 13.22           | Managed | No        | NEG/UD           | NEG/UD     | NEG/UD            | NEG/UD     |
| KNCW3        | 04/12/2019      | 13/01/2020 | 1071      | 24/11/2020      | 21.42           | Managed | No        | NEG/UD           | BL         | NEG/UD            | BL         |
| KRN3         | 12/04/2019      | 13/01/2020 | 566.1     | 24/11/2020      | 11.32           | Managed | No        | NEG/UD           | NEG/UD     | NEG/UD            | NEG/UD     |
| KRN1         | 12/04/2019      | 13/01/2020 | 553.1     | 24/11/2020      | 11.06           | Managed | No        | BL               | NEG/UD     | BL                | NEG/UD     |
| KNCE3        | 12/04/2019      | 13/01/2020 | 419.4     | 24/11/2020      | 8.39            | Managed | No        | NEG/UD           | BL         | NEG/UD            | BL         |
| KNCE2        | 12/04/2019      | 13/01/2020 | 341.3     | 24/11/2020      | 6.83            | Managed | No        | NEG/UD           | BL         | NEG/UD            | BL         |
| KNCW5        | 12/04/2019      | 13/01/2020 | 685       | 24/11/2020      | 13.70           | Managed | No        | NEG/UD           | BL         | NEG/UD            | BL         |

Supplementary Table S2. Oahu samples, NEG/UD = Negative/Undetected, BL = Below the

| Sample ID  | Collection date | Crush date | RNA conc. | Extraction date | Dilution factor | Type    | Treatment | Average copy no. |            | Genome equivalent |            |
|------------|-----------------|------------|-----------|-----------------|-----------------|---------|-----------|------------------|------------|-------------------|------------|
|            |                 |            |           |                 |                 |         |           | DWV-A RdRp       | DWV-B RdRp | DWV-A RdRp        | DWV-B RdRp |
| SW-2       | 28/11/2019      | 21/01/2020 | 303.1     | 23/01/2020      | 6.06            | Feral   | No        | 3.93E+06         | 6.20E+06   | 4.77E+09          | 7.52E+09   |
| TOL4       | 12/03/2019      | 09/01/2020 | 586.4     | 24/11/2020      | 11.73           | Managed | Yes       | 2.05E+04         | 8.76E+04   | 4.81E+07          | 2.06E+08   |
| TOL1       | 12/03/2019      | 09/01/2020 | 444.4     | 24/11/2020      | 8.89            | Managed | Yes       | 2.79E+06         | 1.48E+05   | 4.97E+09          | 2.63E+08   |
| TOL2       | 12/03/2019      | 10/01/2020 | 575.8     | 24/11/2020      | 11.52           | Managed | Yes       | 6.07E+05         | 4.73E+05   | 1.40E+09          | 1.09E+09   |
| TOL3       | 12/03/2019      | 10/01/2020 | 725.2     | 24/11/2020      | 14.50           | Managed | Yes       | 7.35E+05         | 6.77E+05   | 2.13E+09          | 1.96E+09   |
| TOL5       | 12/03/2019      | 13/01/2020 | 496.9     | 24/11/2020      | 9.94            | Managed | Yes       | 1.78E+05         | 5.07E+05   | 3.53E+08          | 1.01E+09   |
| TOLs       | 03/12/2019      | 08/01/2020 | 155.3     | 24/11/2020      | 3.11            | Feral   | No        | 4.24E+05         | 5.71E+06   | 2.63E+08          | 3.55E+09   |
| UH42       | 29/11/2019      | 08/01/2020 | 460.3     | 24/11/2020      | 9.21            | Managed | Yes       | 7.50E+04         | 2.48E+05   | 1.38E+08          | 4.56E+08   |
| UH132      | 29/11/2019      | 08/01/2020 | 693.6     | 24/11/2020      | 13.87           | Managed | Yes       | 3.34E+05         | 5.64E+05   | 9.28E+08          | 1.56E+09   |
| UH127      | 29/11/2019      | 08/01/2020 | 754.7     | 24/11/2020      | 15.09           | Managed | Yes       | 2.89E+06         | 2.36E+06   | 8.72E+09          | 7.12E+09   |
| UH140      | 29/11/2019      | 09/01/2020 | 639.8     | 24/11/2020      | 12.80           | Managed | Yes       | 1.09E+04         | 5.42E+04   | 2.80E+07          | 1.39E+08   |
| UH107      | 29/11/2019      | 09/01/2020 | 700.3     | 24/11/2020      | 14.01           | Managed | Yes       | 2.10E+06         | 1.38E+06   | 5.89E+09          | 3.87E+09   |
| T14        | 16/06/2019      | 09/01/2020 | 433.7     | 24/11/2020      | 8.67            | Feral   | No        | 8.72E+05         | 2.45E+06   | 1.51E+09          | 4.25E+09   |
| OPATCR     | 01/11/2019      | 21/01/2020 | 646.1     | 23/01/2020      | 12.92           | Managed | No        | 4.22E+06         | 6.14E+06   | 1.09E+10          | 1.59E+10   |
| OPATC      | 01/11/2019      | 21/01/2020 | 456.8     | 23/01/2020      | 9.14            | Managed | No        | 4.34E+05         | 2.53E+03   | 7.93E+08          | 4.62E+06   |
| OPATC SCOT | 01/11/2019      | 21/01/2020 | 352.8     | 23/01/2020      | 7.06            | Managed | No        | 1.23E+06         | 5.05E+05   | 1.73E+09          | 7.13E+08   |
| PATC       | 20/11/2019      | 16/01/2020 | 396.3     | 23/01/2020      | 7.93            | Managed | No        | 6.47E+05         | 1.82E+04   | 1.03E+09          | 2.89E+07   |
| OPATCM     | 20/11/2019      | 22/01/2020 | 581.6     | 23/01/2020      | 11.63           | Managed | No        | 1.73E+05         | 1.07E+05   | 4.02E+08          | 2.50E+08   |
| OUGCP20    | 01/11/2019      | 21/01/2020 | 515.9     | 23/01/2020      | 10.32           | Managed | Yes       | 5.38E+06         | 2.67E+05   | 1.11E+10          | 5.50E+08   |
| UGUPC5     | 20/11/2019      | 16/01/2020 | 443.6     | 23/01/2020      | 8.87            | Managed | Yes       | 1.76E+07         | 1.41E+06   | 3.12E+10          | 2.50E+09   |
| OUGCPC3    | 21/11/2019      | 21/01/2020 | 746.2     | 23/01/2020      | 14.92           | Managed | Yes       | 3.44E+06         | 2.46E+06   | 1.03E+10          | 7.36E+09   |
| OUGCWhite  | 20/11/2019      | 22/01/2020 | 511.5     | 23/01/2020      | 10.23           | Managed | Yes       | 1.29E+06         | 1.51E+06   | 2.63E+09          | 3.10E+09   |
| OUGCJ      | 20/11/2019      | 16/01/2020 | 630.5     | 23/01/2020      | 12.61           | Managed | Yes       | 8.35E+04         | 7.24E+04   | 2.11E+08          | 1.83E+08   |
| ODAL1      | 01/11/2019      | 21/01/2020 | 747.4     | 23/01/2020      | 14.95           | Managed | No        | 4.73E+04         | 6.79E+03   | 1.41E+08          | 2.03E+07   |
| ODAL4      | 21/11/2019      | 21/01/2020 | 689.8     | 23/01/2020      | 13.80           | Managed | No        | 8.51E+03         | 2.03E+04   | 2.35E+07          | 5.59E+07   |
| ODAL2      | 21/11/2019      | 22/01/2020 | 549.8     | 23/01/2020      | 11.00           | Managed | No        | 3.59E+06         | 3.21E+04   | 7.90E+09          | 7.07E+07   |
| ODAL5      | 21/11/2019      | 22/01/2020 | 629.0     | 23/01/2020      | 12.58           | Managed | No        | 1.42E+06         | 4.19E+05   | 3.58E+09          | 1.06E+09   |
| ODAL3      | 21/11/2019      | 22/01/2020 | 584.1     | 23/01/2020      | 11.68           | Managed | No        | 7.82E+05         | 1.88E+06   | 1.83E+09          | 4.40E+09   |
| ODEN6AA4   | 21/11/2019      | 21/01/2020 | 715.3     | 23/01/2020      | 14.31           | Managed | No        | 1.90E+06         | 3.46E+05   | 5.45E+09          | 9.89E+08   |
| ODEN5E3    | 21/11/2019      | 21/01/2020 | 713.1     | 23/01/2020      | 14.26           | Managed | No        | 9.06E+05         | 1.35E+06   | 2.58E+09          | 3.84E+09   |
| ODEN8C2    | 21/11/2019      | 22/01/2020 | 583.4     | 23/01/2020      | 11.67           | Managed | No        | 1.65E+06         | 2.74E+06   | 3.85E+09          | 6.39E+09   |
| ODEN7AI    | 21/11/2019      | 22/01/2020 | 750.8     | 23/01/2020      | 15.02           | Managed | No        | 1.82E+06         | 1.40E+06   | 5.46E+09          | 4.19E+09   |
| ODEN6A2    | 21/11/2019      | 22/01/2020 | 803.9     | 23/01/2020      | 16.08           | Managed | No        | 1.34E+05         | 2.21E+05   | 4.30E+08          | 7.10E+08   |
| 4CI 3      | 29/11/2019      | 22/01/2020 | 729.3     | 23/01/2020      | 14.59           | Managed | No        | 1.20E+07         | 9.07E+04   | 3.50E+10          | 2.65E+08   |
| 4CI 4      | 29/11/2019      | 22/01/2020 | 820.9     | 23/01/2020      | 16.42           | Managed | No        | 562.22           | 4849.26    | 1.85E+06          | 1.59E+07   |
| 4CI 5      | 29/11/2019      | 22/01/2020 | 499.7     | 23/01/2020      | 9.99            | Managed | No        | 512.31           | 3420.49    | 1.02E+06          | 6.84E+06   |
| 4CI 1      | 29/11/2019      | 22/01/2020 | 450.9     | 23/01/2020      | 9.02            | Managed | No        | BL               | 625.15     | BL                | 1.13E+06   |
| 4CI 2      | 29/11/2019      | 22/01/2020 | 725       | 23/01/2020      | 14.50           | Managed | No        | NEG/UD           | 3191.33    | NEG/UD            | 9.25E+06   |
| IOD4 1     | 29/11/2019      | 22/01/2020 | 745.0     | 23/01/2020      | 14.90           | Managed | No        | 2.30E+06         | 4.22E+06   | 6.84E+09          | 1.26E+10   |
| IOD4 2     | 29/11/2019      | 22/01/2020 | 786.3     | 23/01/2020      | 15.73           | Managed | No        | 261.25           | 2630.45    | 8.22E+05          | 8.27E+06   |
| IOD4 3     | 29/11/2019      | 22/01/2020 | 824.6     | 23/01/2020      | 16.49           | Managed | No        | BL               | 3385.47    | BL                | 1.12E+07   |
| IOD4 4     | 29/11/2019      | 22/01/2020 | 411.8     | 23/01/2020      | 8.24            | Managed | No        | 259.37           | 2887.09    | 4.27E+05          | 4.76E+06   |
| IOD4 5     | 29/11/2019      | 22/01/2020 | 833.2     | 23/01/2020      | 16.66           | Managed | No        | BL               | 3277.73    | BL                | 1.09E+07   |
| T13        | 08/10/2018      | 08/01/2020 | 295.4     | 24/11/2020      | 5.908           | Feral   | No        | 1.58E+05         | 7.40E+04   | 1.87E+08          | 8.74E+07   |
| T2         | 15/06/2018      | 08/01/2020 | 355.5     | 24/11/2020      | 7.11            | Feral   | No        | 7.84E+04         | 3.16E+04   | 1.12E+08          | 4.50E+07   |
| T1         | 11/01/2018      | 08/01/2020 | 438.1     | 24/11/2020      | 8.762           | Feral   | No        | 5.21E+03         | 1.14E+05   | 9.13E+06          | 2.00E+08   |
| T3         | 13/07/2018      | 08/01/2020 | 366.8     | 24/11/2020      | 7.336           | Feral   | No        | 3.20E+03         | 2.26E+03   | 4.70E+06          | 3.31E+06   |
| T12        | 18/05/2018      | 08/01/2020 | 393.3     | 24/11/2020      | 7.866           | Feral   | No        | 9.11E+04         | 2.92E+05   | 1.43E+08          | 4.60E+08   |
| T12        | 15/06/2018      | 08/01/2020 | 472.2     | 24/11/2020      | 9.444           | Feral   | No        | 3.39E+05         | 9.00E+04   | 6.41E+08          | 1.70E+08   |
| T4         | 09/07/2018      | 08/01/2020 | 536.9     | 24/11/2020      | 10.738          | Feral   | No        | 2.56E+05         | 2.29E+05   | 5.50E+08          | 4.92E+08   |
| T4         | 10/08/2018      | 08/01/2020 | 356.6     | 24/11/2020      | 7.132           | Feral   | No        | 6.08E+05         | 1.70E+05   | 8.67E+08          | 2.42E+08   |

quantifiable threshold

Supplementary Table S3. Big Island samples, NEG/UD = Negative/Undetected, BL = Below the

| Sample ID | Collection date | Crush date | RNA conc. | Extraction date | Dilution factor | Type    | Treatment | Average copy no. |            | Genome equivalent |            |
|-----------|-----------------|------------|-----------|-----------------|-----------------|---------|-----------|------------------|------------|-------------------|------------|
|           |                 |            |           |                 |                 |         |           | DWV-A RdRp       | DWV-B RdRp | DWV-A RdRp        | DWV-B RdRp |
| SP1       | 25/11/2019      | 15/01/2020 | 699.7     | 23/01/2020      | 13.99           | Managed | Yes       | 1.78E+06         | 2.38E+04   | 4.97E+09          | 6.65E+07   |
| SP2       | 25/11/2019      | 15/01/2020 | 745.1     | 24/11/2020      | 14.90           | Managed | Yes       | 2.10E+06         | 3.08E+07   | 6.26E+09          | 9.19E+10   |
| SP3       | 25/11/2019      | 09/01/2020 | 565.3     | 24/11/2020      | 11.31           | Managed | Yes       | 4.67E+04         | 3.11E+06   | 1.06E+08          | 7.03E+09   |
| SP4       | 29/11/2019      | 09/01/2020 | 709.2     | 24/11/2020      | 14.18           | Managed | Yes       | 3.76E+06         | 9.52E+07   | 1.07E+10          | 2.70E+11   |
| SP5       | 25/11/2019      | 14/01/2020 | 592.9     | 24/11/2020      | 11.86           | Managed | Yes       | 8.10E+05         | 4.51E+07   | 1.92E+09          | 1.07E+11   |
| SB4       | 24/11/2019      | 15/01/2020 | 844.8     | 23/01/2020      | 16.90           | Managed | Yes       | 9.64E+06         | 6.66E+06   | 3.26E+10          | 2.25E+10   |
| SB3       | 24/11/2019      | 15/01/2020 | 672.6     | 23/01/2020      | 13.45           | Managed | Yes       | 1.06E+04         | 8.58E+03   | 2.85E+07          | 2.31E+07   |
| SB2       | 24/11/2019      | 16/01/2020 | 910.8     | 23/01/2020      | 18.22           | Managed | Yes       | 3.23E+06         | 1.49E+06   | 1.18E+10          | 5.44E+09   |
| SB5       | 24/11/2019      | 16/01/2020 | 882.0     | 23/01/2020      | 17.64           | Managed | Yes       | 4.24E+04         | 2.47E+03   | 1.50E+08          | 8.72E+06   |
| SB1       | 24/11/2019      | 09/01/2020 | 796.2     | 24/11/2020      | 15.92           | Managed | Yes       | 4.74E+06         | 2.54E+07   | 1.51E+10          | 8.10E+10   |
| GAR1      | 23/11/2019      | 22/01/2020 | 228.0     | 23/01/2020      | 4.56            | Managed | Yes       | 4.87E+04         | 1.55E+06   | 4.44E+07          | 1.42E+09   |
| GAR4      | 23/11/2019      | 22/01/2020 | 457.3     | 23/01/2020      | 9.15            | Managed | Yes       | 5.57E+05         | 4.96E+05   | 1.02E+09          | 9.06E+08   |
| GAR2      | 23/11/2019      | 14/01/2020 | 543.5     | 24/11/2020      | 10.87           | Managed | Yes       | 6.87E+06         | 3.19E+07   | 1.49E+10          | 6.93E+10   |
| GAR3      | 23/11/2019      | 16/01/2020 | 509.2     | 23/01/2020      | 10.18           | Managed | Yes       | 6.80E+06         | 1.77E+06   | 1.38E+10          | 3.61E+09   |
| GAR5      | 23/11/2019      | 14/01/2020 | 318.9     | 24/11/2020      | 6.38            | Managed | Yes       | 9.29E+06         | 7.23E+07   | 1.19E+10          | 9.22E+10   |
| KR3       | 23/11/2019      | 21/01/2020 | 719.8     | 23/01/2020      | 14.40           | Managed | Yes       | 3.32E+03         | 6.60E+04   | 9.57E+06          | 1.90E+08   |
| KR5       | 23/11/2019      | 14/01/2020 | 503.7     | 24/11/2020      | 10.07           | Managed | Yes       | 2.82E+05         | 6.47E+06   | 5.69E+08          | 1.30E+10   |
| KR7       | 23/11/2019      | 16/01/2020 | 480.5     | 23/01/2020      | 9.61            | Managed | Yes       | 1.05E+06         | 5.37E+06   | 2.01E+09          | 1.03E+10   |
| KR4       | 23/11/2019      | 14/01/2020 | 526.2     | 24/11/2020      | 10.52           | Managed | Yes       | BL               | BL         | BL                | BL         |
| KR2       | 23/11/2019      | 14/01/2020 | 675.0     | 24/11/2020      | 13.50           | Managed | Yes       | 473.29           | 71110.55   | 1.28E+06          | 1.92E+08   |
| KR6       | 23/11/2019      | 15/01/2020 | 550.5     | 23/01/2020      | 11.01           | Managed | Yes       | 1.63E+06         | 8.62E+03   | 3.59E+09          | 1.90E+07   |
| KR1       | 23/11/2019      | 14/01/2020 | 437.4     | 24/11/2020      | 8.75            | Managed | Yes       | 1.65E+04         | 4.59E+04   | 2.88E+07          | 8.03E+07   |
| RON1      | 26/11/2019      | 15/01/2020 | 985.9     | 23/01/2020      | 19.72           | Managed | Yes       | 4.77E+07         | 9.42E+06   | 1.88E+11          | 3.72E+10   |
| RON5      | 26/11/2019      | 14/01/2020 | 394.7     | 24/11/2020      | 7.89            | Managed | Yes       | 1445.87          | BL         | 2.28E+06          | BL         |
| RON2      | 26/11/2019      | 14/01/2020 | 649.7     | 24/11/2020      | 12.99           | Managed | Yes       | 1.07E+07         | 5.51E+03   | 2.78E+10          | 1.43E+07   |
| RON4      | 26/11/2019      | 14/01/2020 | 864.2     | 24/11/2020      | 17.28           | Managed | Yes       | 5.63E+04         | 2.87E+03   | 1.94E+08          | 9.91E+06   |
| RON3      | 26/11/2019      | 16/01/2020 | 657.9     | 23/01/2020      | 13.16           | Managed | Yes       | 4.41E+05         | 9.53E+03   | 1.16E+09          | 2.51E+07   |
| DA1       | 24/11/2019      | 15/01/2020 | 659.0     | 23/01/2020      | 13.18           | Managed | Yes       | 2.83E+07         | 9.33E+06   | 7.45E+10          | 2.46E+10   |
| DA2       | 24/11/2019      | 15/01/2020 | 700.6     | 24/11/2020      | 14.01           | Managed | Yes       | BL               | 352279.44  | BL                | 9.87E+08   |
| DA3       | 24/11/2019      | 21/01/2020 | 640.1     | 23/01/2020      | 12.80           | Managed | Yes       | 7.20E+05         | 6.51E+03   | 1.84E+09          | 1.67E+07   |
| DA5       | 24/11/2019      | 16/01/2020 | 553.4     | 23/01/2020      | 11.07           | Managed | Yes       | 1.55E+03         | 6.09E+06   | 3.43E+06          | 1.35E+10   |
| DA4       | 24/11/2019      | 15/01/2020 | 385.0     | 23/01/2020      | 7.70            | Managed | Yes       | 2.39E+07         | 1.67E+05   | 3.67E+10          | 2.57E+08   |
| DT1       | 25/11/2019      | 15/01/2020 | 797.8     | 23/01/2020      | 15.96           | Managed | Yes       | 3.14E+03         | 6.81E+06   | 1.00E+07          | 2.17E+10   |
| DT2       | 25/11/2019      | 14/01/2020 | 684.8     | 24/11/2020      | 13.70           | Managed | Yes       | 7.83E+06         | 2.64E+06   | 2.14E+10          | 7.24E+09   |
| DT3       | 25/11/2019      | 15/01/2020 | 705.7     | 23/01/2020      | 14.11           | Managed | Yes       | 4.27E+05         | 8.41E+04   | 1.20E+09          | 2.37E+08   |
| DT4       | 25/11/2019      | 15/01/2020 | 970.5     | 24/11/2020      | 19.41           | Managed | Yes       | 931.92           | 6043.39    | 2.22E+06          | 9.99E+05   |
| DT5       | 25/11/2019      | 09/01/2020 | 860.6     | 24/11/2020      | 17.21           | Managed | Yes       | 645.84           | BL         | 3.62E+06          | BL         |
| VAN LW1   | 26/11/2019      | 15/01/2020 | 663.1     | 23/01/2020      | 13.26           | Managed | Yes       | 3.57E+06         | 9.05E+06   | 9.47E+09          | 2.40E+10   |
| VAN17     | 26/11/2019      | 15/01/2020 | 619.4     | 24/11/2020      | 12.39           | Managed | Yes       | 283.38           | 1170.97    | 7.02E+05          | 2.90E+06   |
| VAN8      | 26/11/2019      | 14/01/2020 | 777       | 24/11/2020      | 15.54           | Managed | Yes       | 174.69           | BL         | 5.43E+05          | BL         |
| VAN L25   | 26/11/2019      | 15/01/2020 | 810       | 24/11/2020      | 16.20           | Managed | Yes       | 121.06           | 3263.12    | 3.92E+05          | 1.06E+07   |
| VAN4      | 26/11/2019      | 15/01/2020 | 1067.3    | 24/11/2020      | 21.35           | Managed | Yes       | 3.77E+05         | 2.81E+03   | 1.61E+09          | 1.20E+07   |
| SW1       | 24/11/2019      | 16/01/2020 | 578.4     | 23/01/2020      | 11.57           | Feral   | No        | 2.49E+07         | 1.10E+07   | 5.77E+10          | 2.54E+10   |

quantifiable threshold

Table S4. DWV world map references

| Country/Region                                 | Source reference                                                  |
|------------------------------------------------|-------------------------------------------------------------------|
| Argentina – Buenos Aires and Santa Fe province | (Brascesco et al., 2020)                                          |
| Australia                                      | (Roberts, Anderson, & Durr, 2017)                                 |
| Brazil                                         | (de Souza, Kevill, Correia-Oliveira, de Carvalho, & Martin, 2019) |
| Chile                                          | (Riveros et al., 2019)                                            |
| China                                          | (Diao et al., 2019)                                               |
| Cuba                                           | (Luis et al., 2020)                                               |
| Ethiopia – Tigray                              | (Gebremedhn et al., 2020)                                         |
| Fernando de Noronha                            | (Brettell & Martin, 2017)                                         |
| France                                         | (Manley et al., 2019)                                             |
| Germany                                        | (Natsopoulou et al., 2017)                                        |
| Hawaii                                         | This study, (Brettell, Schroeder, & Martin, 2020)                 |
| Kenya                                          | (Ongus, Fombong, Irungu, Masiga, & Raina, 2018)                   |
| Other                                          | (Beaurepaire et al., 2020)                                        |
| Other                                          | (Wilfert et al., 2016)                                            |
| Papua new guinea                               | (Roberts, Simbiken, Dale, Armstrong, & Anderson, 2020)            |
| South Africa                                   | (de Souza, Allsopp, & Martin, 2021)                               |
| Tunisia                                        | (Abdi et al., 2018)                                               |
| Turkey                                         | (Tozkar, Kence, Kence, Huang, & Evans, 2015)                      |
| UK                                             | (Kevill et al., 2019)                                             |
| Uruguay                                        | (Mendoza et al., 2020)                                            |
| USA                                            | (Kevill et al., 2019)                                             |

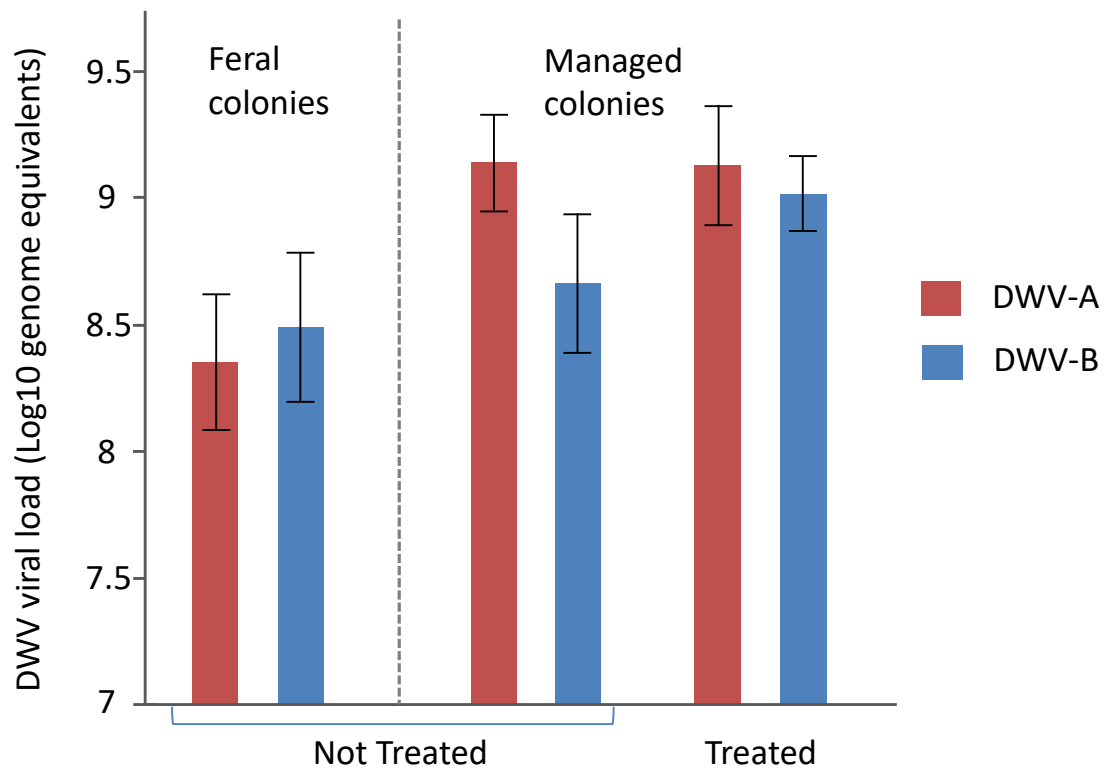

Supplementary Figure S1. Average DWV-A and –B loads in colonies of different treatment type from Oahu with bars showing the standard error.

## References

- Abdi, K., Belguith, K., Hamdi, C., Souissi, Y., Essanaa, J., Dridi, W., . . . Cherif, A. (2018). Parasites-Iflavirus association and emergence of three master variants of DWV affecting *Apis mellifera intermissa* in Tunisian apiaries. *Bulletin of Insectology*, 71(2), 273-282.
- Beaurepaire, A., Piot, N., Doublet, V., Antunez, K., Campbell, E., Chantawannakul, P., . . . Dalmon, A. (2020). Diversity and global distribution of viruses of the western honey bee, *Apis mellifera*. *Insects*, 11(4), 239. doi: 10.3390/insects11040239
- Brasacco, C., Quintana, S., Di Geronimo, V., Genchi Garcia, M. L., Sguazza, G., Bravi, M. E., . . . Maggi, M. (2020). Deformed wing virus type a and b in managed honeybee colonies of Argentina. *Bull Entomol Res*, 1-11. doi:10.1017/S000748532000036X
- Brettell, L. E., & Martin, S. J. (2017). Oldest Varroa tolerant honey bee population provides insight into the origins of the global decline of honey bees. *Sci Rep*, 7, 45953. doi:10.1038/srep45953
- Brettell, L. E., Schroeder, D. C., & Martin, S. J. (2020). RNAseq of Deformed Wing Virus and Other Honey Bee-Associated Viruses in Eight Insect Taxa with or without *Varroa* Infestation. *Viruses*, 12(11). doi:10.3390/v12111229
- de Souza, F. S., Allsopp, M., & Martin, S. J. (2021). Deformed wing virus prevalence and load in honeybees in South Africa. *Arch. Virol.*, 166, 237-241.
- de Souza, F. S., Kevill, J. L., Correia-Oliveira, M. E., de Carvalho, C. A. L., & Martin, S. J. (2019). Occurrence of Deformed wing virus variants in the stingless bee *Melipona subnitida* and

- honey bee *Apis mellifera* populations in Brazil. *J. Gen. Virol.*, *100*(2), 289-294.  
doi:10.1099/jgv.0.001206
- Diao, Q., Yang, D., Zhao, H., Deng, S., Wang, X., Hou, C., & Wilfert, L. (2019). Prevalence and population genetics of the emerging honey bee pathogen DWV in Chinese apiculture. *Sci Rep*, *9*(1), 12042. doi:10.1038/s41598-019-48618-y
- Gebremedhn, H., Deboutte, W., Schoonvaere, K., Demaeght, P., De Smet, L., Amssalu, B., . . . de Graaf, D. C. (2020). Metagenomic Approach with the NetoVIR Enrichment Protocol Reveals Virus Diversity within Ethiopian Honey Bees (*Apis mellifera simensis*). *Viruses*, *12*(11). doi:10.3390/v12111218
- Kevill, J. L., de Souza, F. S., Sharples, C., Oliver, R., Schroeder, D. C., & Martin, S. J. (2019). DWV-A Lethal to Honey Bees (*Apis mellifera*): A Colony Level Survey of DWV Variants (A, B, and C) in England, Wales, and 32 States across the US. *Viruses*, *11*(5). doi:10.3390/v11050426
- Luis, A. R., García, C. A. Y., Invernizzi, C., Branchiccela, B., Piñeiro, A. M. P., Morfi, A. P., . . . Antúnez, K. (2020). Nosema ceranae and RNA viruses in honey bee populations of Cuba. *Journal of Apicultural Research*, *59*(4), 468-471. doi:10.1080/00218839.2020.1749451
- Manley, R., Temperton, B., Doyle, T., Gates, D., Hedges, S., Boots, M., & Wilfert, L. (2019). Knock-on community impacts of a novel vector: spillover of emerging DWV-B from *Varroa*-infested honeybees to wild bumblebees. *Ecol Lett*, *22*(8), 1306-1315. doi:10.1111/ele.13323
- Mendoza, Y., Tomasco, I., Antunez, K., Castelli, L., Branchiccela, B., Santos, E., & Invernizzi, C. (2020). Unraveling honey bee–*Varroa destructor* interaction: Multiple factors involved in differential resistance between two uruguayan populations. *Vet. Sci.*, *7*(3).
- Natsopoulou, M. E., McMahon, D. P., Doublet, V., Frey, E., Rosenkranz, P., & Paxton, R. J. (2017). The virulent, emerging genotype B of Deformed wing virus is closely linked to overwinter honeybee worker loss. *Sci Rep*, *7*(1), 5242. doi:10.1038/s41598-017-05596-3
- Ongus, J. R., Fombong, A. T., Irungu, J., Masiga, D., & Raina, S. (2018). Prevalence of common honey bee pathogens at selected apiaries in Kenya, 2013/2014. *International Journal of Tropical Insect Science*, *38*(1), 58-70. doi:10.1017/S1742758417000212
- Riveros, G., Arismendi, N., Zapata, N., Evans, D., Pérez, I., Aldea, P., & Vargas, M. (2019). Occurrence, prevalence and viral load of deformed wing virus variants in *Apis mellifera* colonies in Chile. *Journal of Apicultural Research*, *59*(1), 63-68. doi:10.1080/00218839.2019.1670993
- Roberts, J. M. K., Anderson, D. L., & Durr, P. A. (2017). Absence of deformed wing virus and *Varroa destructor* in Australia provides unique perspectives on honeybee viral landscapes and colony losses. *Sci. Rep.*, *7*(1), 6925. doi:10.1038/s41598-017-07290-w
- Roberts, J. M. K., Simbiken, N., Dale, C., Armstrong, J., & Anderson, D. L. (2020). Tolerance of honey bees to *Varroa* mite in the absence of Deformed wing virus. *Viruses*, *12*(5). doi:10.3390/v12050575
- Tozkar, C. O., Kence, M., Kence, A., Huang, Q., & Evans, J. D. (2015). Metatranscriptomic analyses of honey bee colonies. *Front Genet*, *6*, 100. doi:10.3389/fgene.2015.00100
- Wilfert, L., Long, G., Leggett, H. C., Schmid-Hempel, P., Butlin, R., Martin, S. J. M., & Boots, M. (2016). Deformed wing virus is a recent global epidemic in honeybees driven by *Varroa* mites. *Science*, *351*(6273), 594. doi:10.1126/science.aac9976
